# Supplementary material for: Changes in Bioactive Compounds, Antioxidant Activity, and Nutritional Quality of Blood Orange Cultivars at Different Storage Temperatures
Source: PubMed Central journal article supplement (PMC7589990; doi:10.3390/antiox9101016), 2020-10-20
Supplement: antioxidants-09-01016-s001.pdf [file antioxidants-09-01016-s001.pdf]

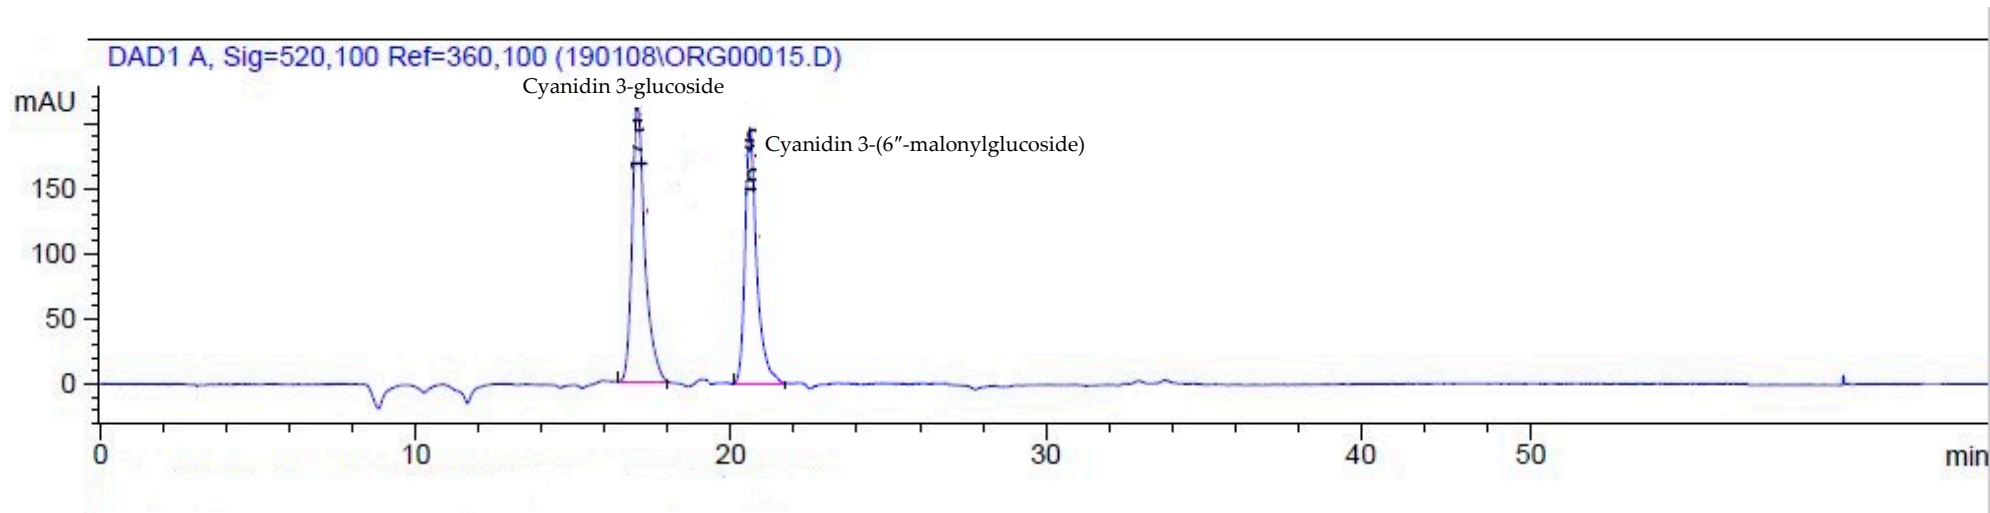

Figure S1. HPLC chromatograms of individual anthocyanins cyanidin 3-glucoside and cyanidin 3-(6''-malonylglucoside).

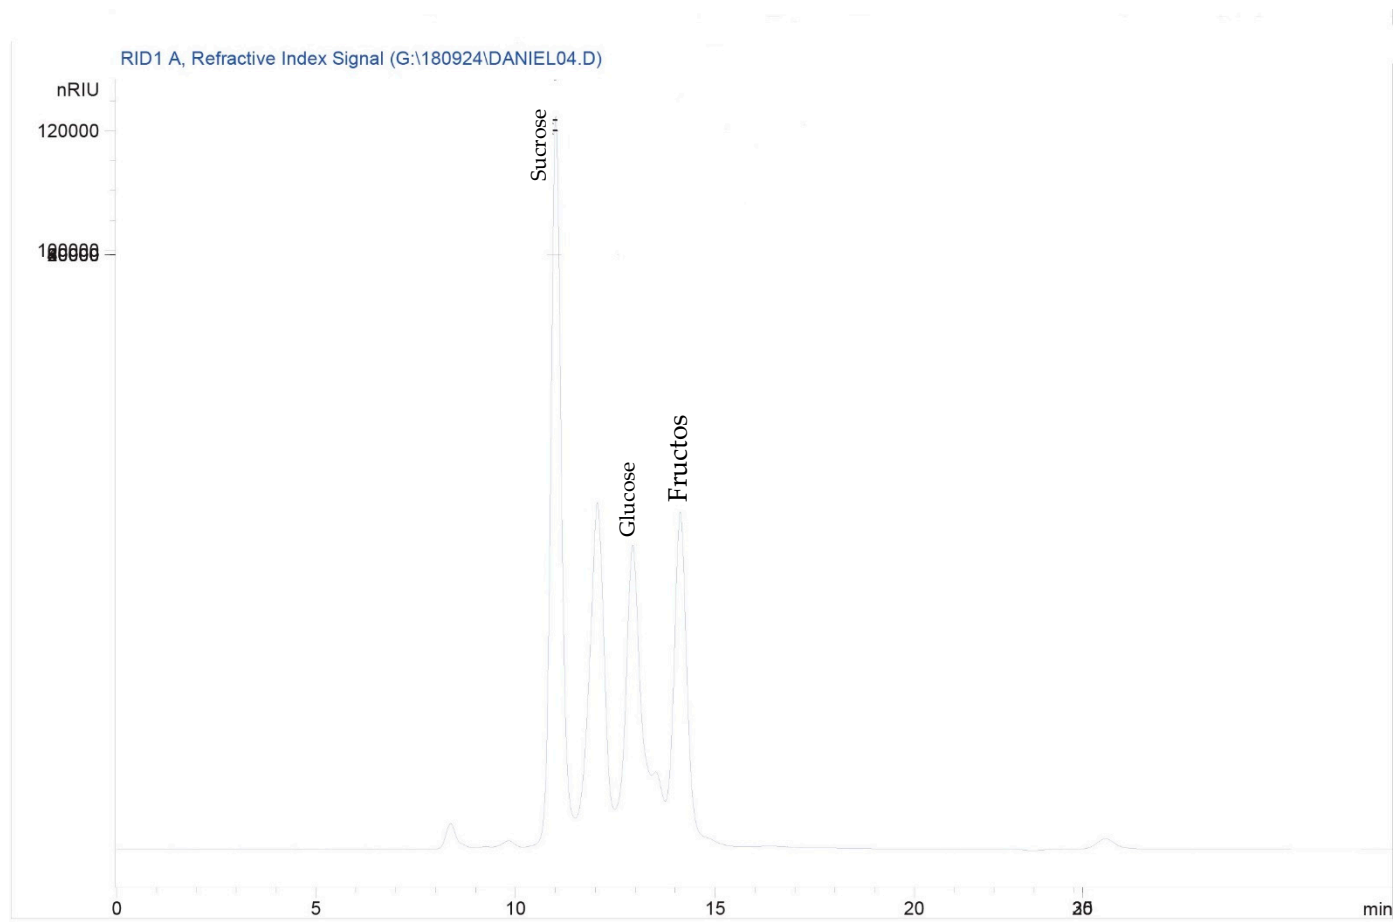

Figure S2. HPLC chromatograms of individual sugars (sucrose, glucose and fructose).

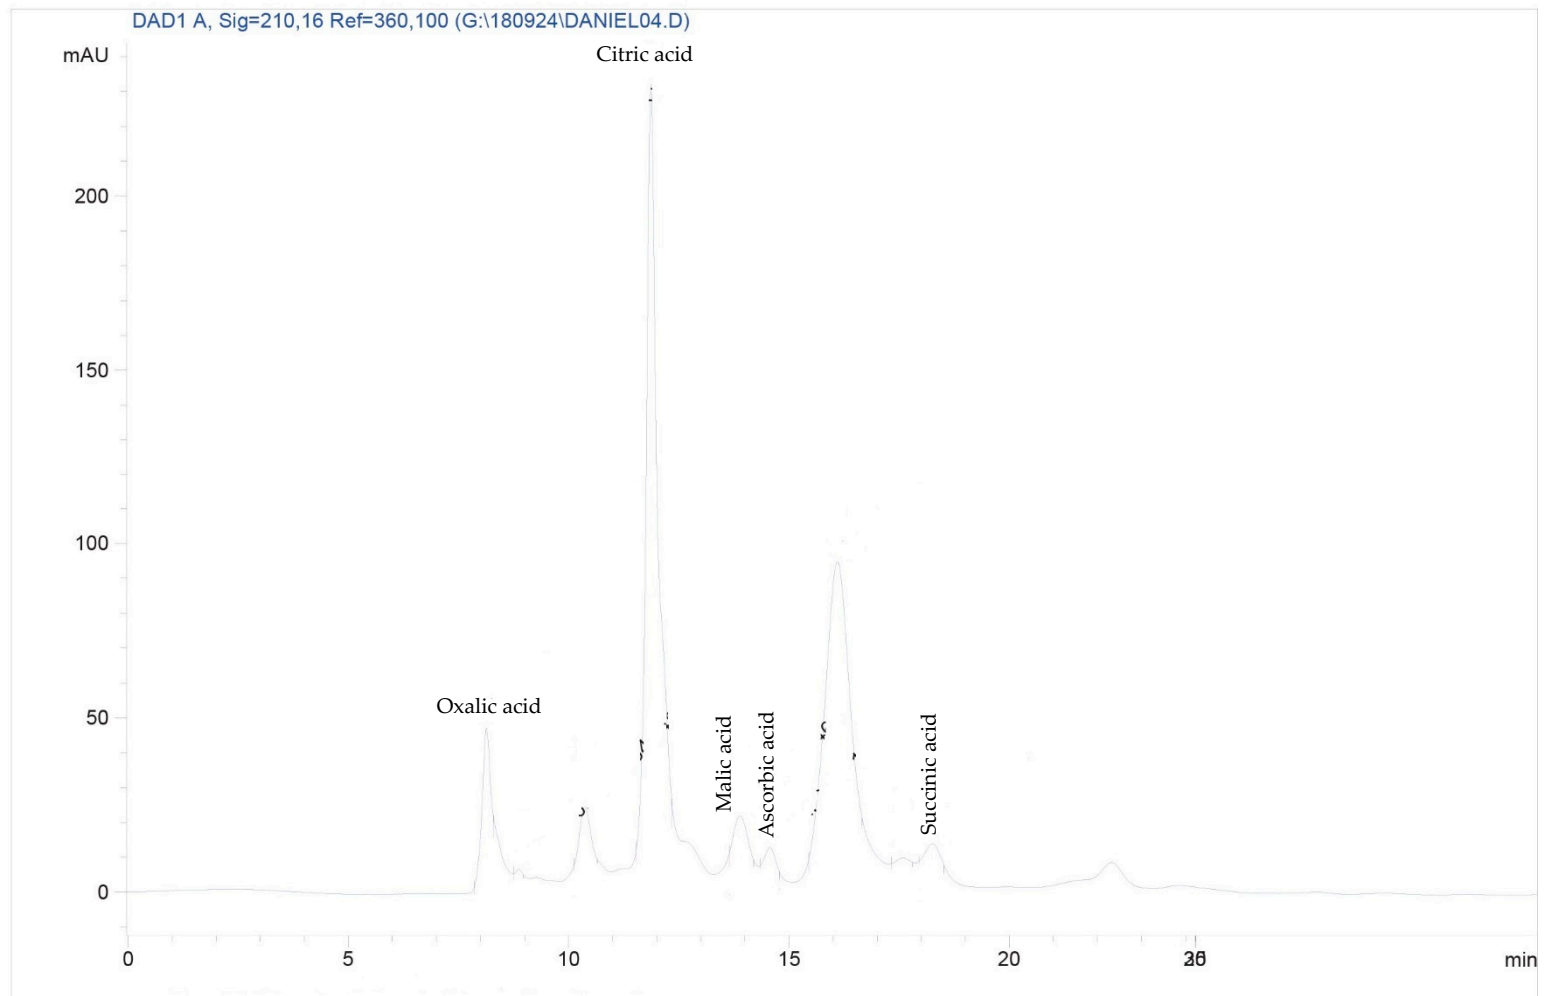

Figure S3. HPLC chromatograms of individual organic acids (citric, ascorbic, malic, oxalic and succinic acids).

**Table S1. Precision and recovery of the HPLC for determination of individual anthocyanins.**

| Individual anthocyanins          | Parameters      | Sample No. | Concentration ( $\mu\text{g/mL}$ ) | Mean  | Standard deviation (SD) | Precision (% RSD) | Recovery (%) |
|----------------------------------|-----------------|------------|------------------------------------|-------|-------------------------|-------------------|--------------|
| Cyanidin 3-glucoside             | Intra-day (n=3) | 1          | 0.663                              | 0.659 | 0.022                   | 3.338             | 99.4         |
|                                  |                 | 2          | 0.661                              | 0.657 | 0.017                   | 2.587             | 99.39        |
|                                  |                 | 3          | 0.689                              | 0.685 | 0.046                   | 6.715             | 99.42        |
|                                  | Inter-day (n=3) | 1          | 0.663                              | 0.665 | 0.031                   | 4.661             | 100.3        |
|                                  |                 | 2          | 0.661                              | 0.665 | 0.016                   | 2.406             | 100.61       |
|                                  |                 | 3          | 0.689                              | 0.675 | 0.042                   | 6.222             | 97.97        |
| Cyanidin 3-(6"-malonylglucoside) | Intra-day (n=3) | 1          | 7.912                              | 7.909 | 0.441                   | 5.575             | 99.96        |
|                                  |                 | 2          | 7.901                              | 7.894 | 0.353                   | 4.471             | 99.91        |
|                                  |                 | 3          | 8.238                              | 8.221 | 0.226                   | 2.749             | 99.79        |
|                                  | Inter-day (n=3) | 1          | 7.912                              | 7.911 | 0.338                   | 4.272             | 99.99        |
|                                  |                 | 2          | 7.901                              | 7.989 | 0.447                   | 5.595             | 101.11       |
|                                  |                 | 3          | 8.238                              | 8.229 | 0.417                   | 5.067             | 99.89        |

**Table S2. Precision and recovery of the HPLC for determination of individual sugars.**

| Individual sugars | Parameters      | Sample No. | Concentration ( $\mu\text{g/mL}$ ) | Mean  | Standard deviation (SD) | Precision (% RSD) | Recovery (%) |
|-------------------|-----------------|------------|------------------------------------|-------|-------------------------|-------------------|--------------|
| Sucrose           | Intra-day (n=3) | 1          | 4.842                              | 4.822 | 0.076                   | 1.576             | 99.59        |
|                   |                 | 2          | 4.843                              | 4.837 | 0.106                   | 2.191             | 99.88        |
|                   |                 | 3          | 4.601                              | 4.543 | 0.089                   | 1.959             | 98.74        |
|                   | Inter-day (n=3) | 1          | 4.842                              | 4.873 | 0.112                   | 2.298             | 100.64       |
|                   |                 | 2          | 4.843                              | 4.848 | 0.108                   | 2.227             | 100.1        |
|                   |                 | 3          | 4.601                              | 4.499 | 0.048                   | 1.066             | 97.78        |
| Glucose           | Intra-day (n=3) | 1          | 2.152                              | 2.144 | 0.088                   | 4.104             | 99.63        |
|                   |                 | 2          | 2.202                              | 2.191 | 0.094                   | 4.29              | 99.50        |
|                   |                 | 3          | 2.165                              | 2.157 | 0.065                   | 3.013             | 99.63        |
|                   | Inter-day (n=3) | 1          | 2.152                              | 2.126 | 0.075                   | 3.527             | 98.79        |
|                   |                 | 2          | 2.202                              | 2.169 | 0.068                   | 3.135             | 98.50        |
|                   |                 | 3          | 2.165                              | 2.136 | 0.084                   | 3.932             | 98.66        |
| Fructose          | Intra-day (n=3) | 1          | 2.622                              | 2.608 | 0.052                   | 1.993             | 99.47        |
|                   |                 | 2          | 2.583                              | 2.573 | 0.027                   | 1.049             | 99.61        |
|                   |                 | 3          | 2.635                              | 2.628 | 0.031                   | 1.179             | 99.73        |
|                   | Inter-day (n=3) | 1          | 2.622                              | 2.592 | 0.055                   | 2.121             | 98.86        |
|                   |                 | 2          | 2.583                              | 2.532 | 0.045                   | 1.777             | 98.03        |
|                   |                 | 3          | 2.635                              | 2.611 | 0.028                   | 1.072             | 99.09        |

**Table S3. Precision and recovery of the HPLC for determination of individual organic acids.**

| Individual sugars | Parameters      | Sample No. | Concentration ( $\mu\text{g/mL}$ ) | Mean  | Standard deviation (SD) | Precision (% RSD) | Recovery (%) |
|-------------------|-----------------|------------|------------------------------------|-------|-------------------------|-------------------|--------------|
| Oxalic acid       | Intra-day (n=3) | 1          | 0.375                              | 0.361 | 0.018                   | 4.986             | 96.27        |
|                   |                 | 2          | 0.365                              | 0.378 | 0.021                   | 5.555             | 103.56       |
|                   |                 | 3          | 0.377                              | 0.364 | 0.025                   | 6.868             | 96.55        |
|                   | Inter-day (n=3) | 1          | 0.375                              | 0.359 | 0.019                   | 5.292             | 95.73        |
|                   |                 | 2          | 0.365                              | 0.359 | 0.025                   | 6.963             | 98.36        |
|                   |                 | 3          | 0.377                              | 0.369 | 0.011                   | 2.981             | 97.88        |
| Citric acid       | Intra-day (n=3) | 1          | 0.477                              | 0.462 | 0.015                   | 3.246             | 96.86        |
|                   |                 | 2          | 0.463                              | 0.451 | 0.018                   | 3.991             | 97.41        |
|                   |                 | 3          | 0.469                              | 0.465 | 0.016                   | 3.441             | 99.15        |
|                   | Inter-day (n=3) | 1          | 0.477                              | 0.459 | 0.014                   | 3.051             | 96.23        |
|                   |                 | 2          | 0.463                              | 0.456 | 0.015                   | 3.289             | 98.49        |
|                   |                 | 3          | 0.469                              | 0.454 | 0.014                   | 3.083             | 96.80        |
| Malic acid        | Intra-day (n=3) | 1          | 38.66                              | 38.38 | 1.877                   | 4.89              | 99.28        |
|                   |                 | 2          | 37.54                              | 37.08 | 1.631                   | 4.398             | 98.77        |
|                   |                 | 3          | 37.43                              | 37.29 | 1.71                    | 4.585             | 99.63        |
|                   | Inter-day (n=3) | 1          | 38.66                              | 37.65 | 1.644                   | 4.366             | 97.39        |
|                   |                 | 2          | 37.54                              | 36.58 | 1.559                   | 4.261             | 97.44        |
|                   |                 | 3          | 37.43                              | 36.91 | 1.498                   | 4.058             | 98.61        |
| Ascorbic acid     | Intra-day (n=3) | 1          | 15.56                              | 15.27 | 0.546                   | 3.575             | 98.14        |
|                   |                 | 2          | 15.63                              | 15.55 | 0.525                   | 3.376             | 99.49        |
|                   |                 | 3          | 15.54                              | 15.41 | 0.505                   | 3.277             | 99.16        |
|                   | Inter-day (n=3) | 1          | 15.56                              | 15.22 | 0.592                   | 3.889             | 97.81        |
|                   |                 | 2          | 15.63                              | 15.19 | 0.491                   | 3.232             | 97.18        |
|                   |                 | 3          | 15.54                              | 15.46 | 0.515                   | 3.331             | 99.49        |
| Succinic acid     | Intra-day (n=3) | 1          | 37.96                              | 37.11 | 1.659                   | 4.47              | 97.76        |
|                   |                 | 2          | 38.93                              | 38.63 | 1.397                   | 3.616             | 99.23        |
|                   |                 | 3          | 38.88                              | 38.22 | 1.232                   | 3.223             | 98.30        |
|                   | Inter-day (n=3) | 1          | 37.96                              | 36.97 | 1.575                   | 4.26              | 97.39        |
|                   |                 | 2          | 38.93                              | 37.84 | 1.681                   | 4.442             | 97.20        |
|                   |                 | 3          | 38.88                              | 36.73 | 1.768                   | 4.813             | 94.47        |
